# Supplementary material
Source: PubMed Central journal article supplement (PMC2730602)
Supplement: NIHMS87254-supplement-01.pdf [file NIHMS87254-supplement-01.pdf]

**Supplementary Figure 1:** The NF1-associated gene expression signature is specific to pilocytic astrocytoma. Heat map based on the top candidate genes differentially expressed in NF1-associated pilocytic astrocytomas with positive calls in a malignant peripheral nerve sheath tumor (MPNST) dataset. The genes are not differentially expressed in NF1-associated (red box) compared to sporadic MPNSTs.

Type of file: figure

Label: 8

Filename: Rays Supplementary figure 1.ppt



Type of file: table

Label: 5

Filename: Rays Supplementary Table

Supplementary Table 1. Transcripts with False Discovery Rate Less than 1

| Transcript | UniGene ID | Gene Title                                                                                   | Gene Symbol | Fold Change (NF1-associated/sporadic) |
|------------|------------|----------------------------------------------------------------------------------------------|-------------|---------------------------------------|
| 242232_at  | Hs.497575  | SLIT-ROBO Rho GTPase activating protein 2                                                    | SRGAP2      | 5.28                                  |
| 244357_at  | Hs.15200   | Stromal membrane-associated protein 1-like                                                   | SMAP1L      | 3.84                                  |
| 240665_at  | Hs.309288  | CUG triplet repeat, RNA binding protein 2                                                    | CUGBP2      | 3.43                                  |
| 232568_at  | ---        | hypothetical protein MGC24103                                                                | MGC24103    | 3.41                                  |
| 242903_at  | Hs.520414  | interferon gamma receptor 1                                                                  | IFNGR1      | 3.41                                  |
| 244358_at  | ---        | ---                                                                                          | ---         | 3.17                                  |
| 1556323_at | Hs.309288  | CUG triplet repeat, RNA binding protein 2                                                    | CUGBP2      | 3.03                                  |
| 233867_at  | Hs.610960  | CDNA FLJ20112 fis, clone COL05405                                                            | ---         | 3.01                                  |
| 237018_at  | Hs.459211  | A kinase (PRKA) anchor protein 13                                                            | AKAP13      | 2.93                                  |
| 232670_at  | Hs.636495  | CDNA FLJ11735 fis, clone HEMBA1005447                                                        | ---         | 2.91                                  |
| 233036_at  | Hs.435309  | Basonuclin 2                                                                                 | BNC2        | 2.87                                  |
| 242268_at  | Hs.309288  | CUG triplet repeat, RNA binding protein 2                                                    | CUGBP2      | 2.85                                  |
| 1569477_at | Hs.591328  | Forkhead box O3A                                                                             | FOXO3A      | 2.80                                  |
| 236781_at  | Hs.544636  | Ankyrin repeat and sterile alpha motif domain containing 1A                                  | ANKS1A      | 2.80                                  |
| 240038_at  | Hs.592742  | Elongation factor, RNA polymerase II, 2                                                      | ELL2        | 2.74                                  |
| 231109_at  | Hs.309288  | CUG triplet repeat, RNA binding protein 2                                                    | CUGBP2      | 2.71                                  |
| 244508_at  | Hs.191346  | Septin 7                                                                                     | SEPT7       | 2.68                                  |
| 206140_at  | Hs.445265  | LIM homeobox 2                                                                               | LHX2        | 2.68                                  |
| 242143_at  | Hs.306242  | RAN binding protein 9                                                                        | RANBP9      | 2.67                                  |
| 214405_at  | Hs.309288  | CUG triplet repeat, RNA binding protein 2                                                    | CUGBP2      | 2.64                                  |
| 243450_at  | Hs.459211  | A kinase (PRKA) anchor protein 13                                                            | AKAP13      | 2.61                                  |
| 237849_at  | Hs.102788  | Mannosidase, alpha, class 1A, member 1                                                       | MAN1A1      | 2.60                                  |
| 219024_at  | Hs.287830  | pleckstrin homology domain containing, family A (phosphoinositide binding specific) member 1 | PLEKHA1     | 2.60                                  |
| 205105_at  | Hs.432822  | mannosidase, alpha, class 2A, member 1                                                       | MAN2A1      | 2.57                                  |
| 233674_at  | Hs.591328  | Forkhead box O3A                                                                             | FOXO3A      | 2.56                                  |
| 215574_at  | Hs.591973  | Hypothetical protein LOC646089                                                               | LOC646089   | 2.48                                  |
| 240865_at  | ---        | ---                                                                                          | ---         | 2.46                                  |
| 243271_at  | Hs.489118  | Sterile alpha motif domain containing 9-like                                                 | SAMD9L      | 2.45                                  |
| 1560926_at | Hs.431092  | Protein phosphatase 4, regulatory subunit 2                                                  | PPP4R2      | 2.43                                  |
| 237456_at  | Hs.7910    | RING1 and YY1 binding protein                                                                | RYBP        | 2.41                                  |
| 230892_at  | Hs.39429   | 2-deoxyribose-5-phosphate aldolase homolog (C. elegans)                                      | DERA        | 2.38                                  |
| 242320_at  | Hs.591328  | Forkhead box O3A                                                                             | FOXO3A      | 2.32                                  |
| 237262_at  | Hs.594689  | Full length insert cDNA clone ZE05E03                                                        | ---         | 2.30                                  |
| 216022_at  | Hs.594024  | Transcribed locus                                                                            | ---         | 2.30                                  |
| 241769_at  | Hs.436873  | Integrin, alpha V (vitronectin receptor, alpha polypeptide, antigen CD51)                    | ITGAV       | 2.26                                  |
| 237026_at  | Hs.38621   | Sorbin and SH3 domain containing 1                                                           | SORBS1      | 2.26                                  |
| 238563_at  | Hs.508148  | Abl-interactor 1                                                                             | ABI1        | 2.25                                  |
| 236512_at  | Hs.591336  | Sestrin 1                                                                                    | SESN1       | 2.22                                  |
| 240351_at  | Hs.486228  | Hypothetical protein LOC643749                                                               | LOC643749   | 2.20                                  |
| 230071_at  | Hs.128199  | Septin 11                                                                                    | SEPT11      | 2.19                                  |
| 243739_at  | Hs.306242  | RAN binding protein 9                                                                        | RANBP9      | 2.18                                  |
| 220612_at  | ---        | hypothetical protein LOC643328                                                               | LOC643328   | 2.18                                  |

|              |           |                                                                                                                                                     |                            |      |
|--------------|-----------|-----------------------------------------------------------------------------------------------------------------------------------------------------|----------------------------|------|
|              |           |                                                                                                                                                     | 8                          |      |
| 218876_at    | Hs.534458 | brain specific protein /// brain specific protein                                                                                                   | CGI-38                     | 2.12 |
| 213593_s_at  | Hs.445652 | transformer-2 alpha                                                                                                                                 | TRA2A                      | 2.11 |
| 207002_s_at  | Hs.444975 | pleiomorphic adenoma gene-like 1                                                                                                                    | PLAGL1                     | 2.09 |
| 215147_at    | Hs.309288 | CUG triplet repeat, RNA binding protein 2                                                                                                           | CUGBP2                     | 2.07 |
| 240146_at    | Hs.446123 | Capping protein (actin filament) muscle Z-line, alpha 2                                                                                             | CAPZA2                     | 2.04 |
| 232890_at    | Hs.509499 | Chromosome 14 open reading frame 135                                                                                                                | C14orf135                  | 2.04 |
| 240141_at    | Hs.418198 | PAP associated domain containing 4                                                                                                                  | PAPD4                      | 2.03 |
| 205931_s_at  | Hs.437075 | cAMP responsive element binding protein 5                                                                                                           | CREB5                      | 2.02 |
| 229593_at    | Hs.586218 | H2A histone family, member Y                                                                                                                        | H2AFY                      | 2.02 |
| 232929_at    | Hs.122417 | Zinc finger and BTB domain containing 20                                                                                                            | ZBTB20                     | 2.01 |
| 227405_s_at  | Hs.302634 | frizzled homolog 8 (Drosophila)                                                                                                                     | FZD8                       | 2.01 |
| 232500_at    | Hs.472285 | chromosome 20 open reading frame 74                                                                                                                 | C20orf74                   | 2.01 |
| 244801_at    | Hs.213470 | Proteasome (prosome, macropain) subunit, beta type, 7                                                                                               | PSMB7                      | 1.96 |
| 216211_at    | Hs.590989 | Chromosome 10 open reading frame 18                                                                                                                 | C10orf18                   | 1.95 |
| 240824_at    | Hs.134491 | Oligonucleotide/oligosaccharide-binding fold containing 1                                                                                           | OBFC1                      | 1.94 |
| 235735_at    | Hs.494901 | Tumor necrosis factor (ligand) superfamily, member 8                                                                                                | TNFSF8                     | 1.92 |
| 240829_at    | Hs.7277   | Peroxisomal biogenesis factor 3                                                                                                                     | PEX3                       | 1.90 |
| 205145_s_at  | Hs.410970 | myosin, light polypeptide 5, regulatory /// similar to Superfast myosin regulatory light chain 2 (MyLC-2) (MYLC2) (Myosin regulatory light chain 5) | MYL5 ///<br>LOC64985<br>1  | 1.88 |
| 242144_at    | Hs.418198 | PAP associated domain containing 4                                                                                                                  | PAPD4                      | 1.85 |
| 239788_at    | Hs.174021 | Smu-1 suppressor of mec-8 and unc-52 homolog (C. elegans)                                                                                           | SMU1                       | 1.84 |
| 239597_at    | Hs.369984 | PAN3 polyA specific ribonuclease subunit homolog (S. cerevisiae)                                                                                    | PAN3                       | 1.83 |
| 235757_at    | Hs.590989 | Chromosome 10 open reading frame 18                                                                                                                 | C10orf18                   | 1.82 |
| 1558842_at   | ---       | ---                                                                                                                                                 | ---                        | 1.79 |
| 212629_s_at  | Hs.440833 | protein kinase N2                                                                                                                                   | PKN2                       | 1.79 |
| 227948_at    | Hs.117835 | FYVE, RhoGEF and PH domain containing 4                                                                                                             | FGD4                       | 1.78 |
| 236841_at    | ---       | ---                                                                                                                                                 | ---                        | 1.76 |
| 210908_s_at  | Hs.288856 | prefoldin subunit 5                                                                                                                                 | PFDN5                      | 1.73 |
| 213156_at    | Hs.592414 | Homo sapiens, clone IMAGE:4214654, mRNA                                                                                                             | ---                        | 1.70 |
| 240326_at    | Hs.577252 | SET binding factor 2                                                                                                                                | SBF2                       | 1.69 |
| 236659_x_at  | Hs.489722 | Zinc finger protein 277                                                                                                                             | ZNF277                     | 1.67 |
| 230375_at    | Hs.591345 | chromosome 6 open reading frame 111                                                                                                                 | C6orf111                   | 1.66 |
| 232945_at    | Hs.368348 | Hypothetical protein FLJ32312                                                                                                                       | FLJ32312                   | 1.66 |
| 215338_s_at  | Hs.529509 | natural killer-tumor recognition sequence                                                                                                           | NKTR                       | 1.65 |
| 237733_at    | Hs.368282 | KIAA0564 protein                                                                                                                                    | RP11-<br>125A7.3           | 1.65 |
| 207132_x_at  | Hs.288856 | prefoldin subunit 5                                                                                                                                 | PFDN5                      | 1.65 |
| 235652_at    | Hs.109655 | Sex comb on midleg-like 1 (Drosophila)                                                                                                              | SCML1                      | 1.64 |
| 243584_at    | Hs.25338  | Protease, serine, 23                                                                                                                                | PRSS23                     | 1.60 |
| 242877_at    | Hs.407368 | LSM14 homolog A (SCD6, S. cerevisiae)                                                                                                               | LSM14A                     | 1.54 |
| 243240_at    | Hs.21422  | Neuronal cell adhesion molecule                                                                                                                     | NRCAM                      | 1.52 |
| 226999_at    | ---       | RNA-binding region (RNP1, RRM) containing 3                                                                                                         | RNPC3                      | 1.51 |
| 1555897_at   | Hs.591518 | amine oxidase (flavin containing) domain 2                                                                                                          | AOF2                       | 1.44 |
| 208646_at    | Hs.592391 | ribosomal protein S14 /// similar to ribosomal protein S14                                                                                          | RPS14 ///<br>LOC64406<br>8 | 1.41 |
| 1558678_s_at | Hs.593060 | metastasis associated lung adenocarcinoma transcript 1 (non-coding RNA)                                                                             | MALAT1                     | 1.39 |
| 219251_s_at  | Hs.389945 | WD repeat domain 60                                                                                                                                 | WDR60                      | 1.38 |

|              |           |                                                                                                                                 |                         |      |
|--------------|-----------|---------------------------------------------------------------------------------------------------------------------------------|-------------------------|------|
| 225563_at    | Hs.369984 | PAN3 polyA specific ribonuclease subunit homolog (S. cerevisiae)                                                                | PAN3                    | 1.32 |
| 223904_at    | Hs.591634 | protein kinase, AMP-activated, gamma 3 non-catalytic subunit                                                                    | PRKAG3                  | 0.89 |
| 238724_at    | Hs.198365 | 2,3-bisphosphoglycerate mutase                                                                                                  | BPGM                    | 0.89 |
| 214688_at    | Hs.444213 | transducin-like enhancer of split 4 (E(sp1) homolog, Drosophila)                                                                | TLE4                    | 0.85 |
| 216561_x_at  | ---       | ---                                                                                                                             | ---                     | 0.85 |
| 1568923_at   | Hs.488478 | Hypothetical protein FLJ10099                                                                                                   | FLJ10099                | 0.83 |
| 240300_at    | Hs.512619 | Thymidine kinase 2, mitochondrial                                                                                               | TK2                     | 0.80 |
| 209128_s_at  | Hs.584842 | squamous cell carcinoma antigen recognised by T cells 3                                                                         | SART3                   | 0.78 |
| 1555947_at   | Hs.372003 | family with sequence similarity 120A                                                                                            | FAM120A                 | 0.76 |
| 214228_x_at  | Hs.129780 | tumor necrosis factor receptor superfamily, member 4                                                                            | TNFRSF4                 | 0.76 |
| 201684_s_at  | Hs.555910 | chromosome 14 open reading frame 92                                                                                             | C14orf92                | 0.74 |
| 205252_at    | Hs.155204 | zinc finger protein 174                                                                                                         | ZNF174                  | 0.73 |
| 219928_s_at  | Hs.511983 | calcium binding tyrosine-(Y)-phosphorylation regulated (fibrousheathin 2)                                                       | CABYR                   | 0.72 |
| 201000_at    | Hs.315137 | alanyl-tRNA synthetase                                                                                                          | AARS                    | 0.72 |
| 1557581_x_at | Hs.517478 | Calcineurin binding protein 1                                                                                                   | CABIN1                  | 0.71 |
| 1554311_a_at | Hs.250429 | suppressor of Ty 6 homolog (S. cerevisiae)                                                                                      | SUPT6H                  | 0.70 |
| 222911_s_at  | Hs.98321  | chromosome X open reading frame 36                                                                                              | CXorf36                 | 0.70 |
| 239790_s_at  | Hs.211973 | Exosome component 2                                                                                                             | EXOSC2                  | 0.70 |
| 220607_x_at  | Hs.517148 | TH1-like (Drosophila)                                                                                                           | TH1L                    | 0.69 |
| 1552696_at   | Hs.511797 | non imprinted in Prader-Willi/Angelman syndrome 1                                                                               | NIPA1                   | 0.69 |
| 230822_at    | Hs.568653 | transmembrane protein 61                                                                                                        | TMEM61                  | 0.69 |
| 241813_at    | Hs.405610 | methyl-CpG binding domain protein 1                                                                                             | MBD1                    | 0.69 |
| 226744_at    | Hs.632237 | methyltransferase 10 domain containing                                                                                          | METT10D                 | 0.69 |
| 1554973_a_at | Hs.5638   | zinc finger and BTB domain containing 26                                                                                        | ZBTB26                  | 0.69 |
| 221064_s_at  | Hs.161279 | chromosome 16 open reading frame 28                                                                                             | C16orf28                | 0.68 |
| 208223_s_at  | Hs.438918 | activin A receptor, type IB                                                                                                     | ACVR1B                  | 0.67 |
| 212786_at    | Hs.35490  | KIAA0350 protein                                                                                                                | KIAA0350                | 0.67 |
| 218023_s_at  | Hs.54056  | family with sequence similarity 53, member C                                                                                    | FAM53C                  | 0.66 |
| 225755_at    | Hs.13781  | kelch domain containing 8B                                                                                                      | KLHDC8B                 | 0.66 |
| 209021_x_at  | ---       | KIAA0652                                                                                                                        | KIAA0652                | 0.66 |
| 1554283_at   | Hs.548091 | CCR4 carbon catabolite repression 4-like (S. cerevisiae)                                                                        | CCRN4L                  | 0.66 |
| 1559163_at   | ---       | hypothetical protein LOC285954                                                                                                  | LOC285954               | 0.63 |
| 1555904_at   | Hs.594371 | Homo sapiens, clone IMAGE:4779853, mRNA                                                                                         | ---                     | 0.62 |
| 203838_s_at  | Hs.518513 | tyrosine kinase, non-receptor, 2                                                                                                | TNK2                    | 0.61 |
| 205436_s_at  | Hs.477879 | H2A histone family, member X                                                                                                    | H2AFX                   | 0.61 |
| 230764_at    | Hs.308074 | Chromosome 9 open reading frame 5                                                                                               | C9orf5                  | 0.61 |
| 223852_s_at  | Hs.471768 | serine/threonine kinase 40                                                                                                      | STK40                   | 0.61 |
| 227234_at    | Hs.535549 | CDNA FLJ32177 fis, clone PLACE6001294                                                                                           | ---                     | 0.61 |
| 236537_at    | Hs.596399 | CDNA FLJ23896 fis, clone LNG15157                                                                                               | ---                     | 0.60 |
| 223575_at    | Hs.490294 | KIAA1549 protein                                                                                                                | KIAA1549                | 0.59 |
| 223693_s_at  | Hs.487409 | hypothetical protein FLJ10324                                                                                                   | FLJ10324                | 0.59 |
| 201673_s_at  | Hs.386225 | glycogen synthase 1 (muscle)                                                                                                    | GYS1                    | 0.58 |
| 215305_at    | Hs.74615  | platelet-derived growth factor receptor, alpha polypeptide /// tripartite motif-containing 6 and tripartite motif-containing 34 | PDGFRA /// TRIM6-TRIM34 | 0.58 |
| 226531_at    | Hs.55148  | transmembrane protein 142A                                                                                                      | TMEM142A                | 0.57 |
| 208289_s_at  | Hs.591939 | etoposide induced 2.4 mRNA                                                                                                      | EI24                    | 0.57 |
| 1438_at      | Hs.2913   | EPH receptor B3                                                                                                                 | EPHB3                   | 0.57 |

|              |           |                                                                               |                    |      |
|--------------|-----------|-------------------------------------------------------------------------------|--------------------|------|
| 203367_at    | Hs.91448  | dual specificity phosphatase 14                                               | DUSP14             | 0.56 |
| 230659_at    | Hs.224616 | ER degradation enhancer, mannosidase alpha-like 1                             | EDEM1              | 0.56 |
| 221908_at    | Hs.437195 | Transmembrane protein 118                                                     | TMEM118            | 0.55 |
| 227574_at    | Hs.526594 | obscurin-like 1                                                               | OBSL1              | 0.54 |
| 204423_at    | Hs.44693  | muskelin 1, intracellular mediator containing kelch motifs                    | MKLN1              | 0.54 |
| 49051_g_at   | Hs.32374  | deltex 3 homolog (Drosophila)                                                 | DTX3               | 0.54 |
| 49049_at     | Hs.32374  | deltex 3 homolog (Drosophila)                                                 | DTX3               | 0.53 |
| 205807_s_at  | Hs.489922 | tuftelin 1                                                                    | TUFT1              | 0.53 |
| 218086_at    | Hs.105547 | neural proliferation, differentiation and control, 1                          | NPDC1              | 0.53 |
| 219527_at    | Hs.369042 | MOCO sulphurase C-terminal domain containing 2                                | MOSC2              | 0.53 |
| 1553158_at   | Hs.334526 | chromosome 3 open reading frame 34                                            | C3orf34            | 0.51 |
| 231737_at    | Hs.514423 | calcium channel, voltage-dependent, gamma subunit 4                           | CACNG4             | 0.51 |
| 220197_at    | Hs.98967  | ATPase, H+ transporting, lysosomal V0 subunit a4                              | ATP6V0A4           | 0.51 |
| 215847_at    | Hs.510685 | hypothetical protein LOC283755                                                | LOC283755          | 0.51 |
| 224739_at    | Hs.530381 | pim-3 oncogene                                                                | PIM3               | 0.51 |
| 232226_at    | Hs.135736 | leucine rich repeat containing 4C                                             | LRRC4C             | 0.51 |
| 226056_at    | Hs.477278 | Cdc42 GTPase-activating protein                                               | CDGAP              | 0.47 |
| 209736_at    | Hs.201671 | SRY (sex determining region Y)-box 13                                         | SOX13              | 0.44 |
| 205392_s_at  | Hs.272493 | chemokine (C-C motif) ligand 14 /// chemokine (C-C motif) ligand 15           | CCL14 ///<br>CCL15 | 0.43 |
| 218574_s_at  | Hs.475353 | LIM and cysteine-rich domains 1                                               | LMCD1              | 0.43 |
| 222723_at    | Hs.449009 | von Willebrand factor A domain containing 1                                   | VWA1               | 0.43 |
| 205535_s_at  | Hs.570785 | BH-protocadherin (brain-heart)                                                | PCDH7              | 0.42 |
| 205286_at    | Hs.473152 | transcription factor AP-2 gamma (activating enhancer binding protein 2 gamma) | TFAP2C             | 0.40 |
| 206329_at    | Hs.150956 | exostoses (multiple)-like 1                                                   | EXTL1              | 0.40 |
| 1555962_at   | Hs.299329 | UDP-GlcNAc:betaGal beta-1,3-N-acetylglucosaminyltransferase 7                 | B3GNT7             | 0.37 |
| 38918_at     | Hs.201671 | SRY (sex determining region Y)-box 13                                         | SOX13              | 0.37 |
| 229655_at    | Hs.436854 | family with sequence similarity 19 (chemokine (C-C motif)-like), member A5    | FAM19A5            | 0.36 |
| 228770_at    | Hs.585007 | G protein-coupled receptor 146                                                | GPR146             | 0.35 |
| 208065_at    | Hs.23172  | ST8 alpha-N-acetyl-neuraminide alpha-2,8-sialyltransferase 3                  | ST8SIA3            | 0.34 |
| 226499_at    | Hs.535075 | similar to ankyrin-repeat protein Nrarp                                       | MGC61598           | 0.34 |
| 221585_at    | Hs.514423 | calcium channel, voltage-dependent, gamma subunit 4                           | CACNG4             | 0.33 |
| 214761_at    | Hs.530930 | zinc finger protein 423                                                       | ZNF423             | 0.32 |
| 202022_at    | Hs.155247 | aldolase C, fructose-bisphosphate                                             | ALDOC              | 0.32 |
| 1554281_at   | ---       | ---                                                                           | ---                | 0.32 |
| 206645_s_at  | Hs.268490 | nuclear receptor subfamily 0, group B, member 1                               | NR0B1              | 0.31 |
| 1569879_a_at | Hs.438250 | multiple EGF-like-domains 11                                                  | MEGF11             | 0.31 |
| 237268_at    | Hs.397800 | Down syndrome cell adhesion molecule                                          | DSCAM              | 0.29 |
| 1569481_s_at | Hs.599195 | sorting nexin 22                                                              | SNX22              | 0.28 |
| 219010_at    | Hs.518997 | chromosome 1 open reading frame 106                                           | C1orf106           | 0.27 |
| 213768_s_at  | Hs.524672 | achaete-scute complex-like 1 (Drosophila)                                     | ASCL1              | 0.27 |
| 205208_at    | Hs.434435 | aldehyde dehydrogenase 1 family, member L1                                    | ALDH1L1            | 0.27 |
| 236034_at    | ---       | ---                                                                           | ---                | 0.27 |
| 226913_s_at  | Hs.243678 | SRY (sex determining region Y)-box 8                                          | SOX8               | 0.27 |
| 228307_at    | Hs.25897  | elastin microfibril interfacier 3                                             | EMILIN3            | 0.27 |
| 240218_at    | Hs.160418 | Transcribed locus                                                             | ---                | 0.26 |
| 225777_at    | Hs.19322  | chromosome 9 open reading frame 140                                           | C9orf140           | 0.26 |
| 227703_s_at  | Hs.592224 | synaptotagmin-like 4 (granophilin-a)                                          | SYTL4              | 0.26 |



|              |           |                                                                                                  |          |      |
|--------------|-----------|--------------------------------------------------------------------------------------------------|----------|------|
| 220595_at    | Hs.380044 | PDZ domain containing RING finger 4                                                              | PDZRN4   | 0.26 |
| 234472_at    | Hs.470277 | UDP-N-acetyl-alpha-D-galactosamine:polypeptide N-acetylgalactosaminyltransferase 13 (GalNAc-T13) | GALNT13  | 0.25 |
| 214038_at    | Hs.271387 | chemokine (C-C motif) ligand 8                                                                   | CCL8     | 0.24 |
| 231798_at    | Hs.248201 | Noggin                                                                                           | NOG      | 0.23 |
| 232054_at    | Hs.391781 | protocadherin 20                                                                                 | PCDH20   | 0.21 |
| 209443_at    | Hs.510334 | serpin peptidase inhibitor, clade A (alpha-1 antiproteinase, antitrypsin), member 5              | SERPINA5 | 0.19 |
| 206243_at    | Hs.591665 | TIMP metalloproteinase inhibitor 4                                                               | TIMP4    | 0.18 |
| 219197_s_at  | Hs.523468 | signal peptide, CUB domain, EGF-like 2                                                           | SCUBE2   | 0.16 |
| 235639_at    | Hs.594900 | Transcribed locus                                                                                | ---      | 0.13 |
| 206869_at    | Hs.97220  | chondroadherin                                                                                   | CHAD     | 0.11 |
| 205229_s_at  | Hs.21016  | coagulation factor C homolog, coxlin (Limulus polyphemus)                                        | COCH     | 0.07 |
| 1555403_a_at | Hs.42771  | cadherin 19, type 2                                                                              | CDH19    | 0.07 |
